# Supplementary figures and images for: Effect of Polymer Additives on the Microstructure and Mechanical Properties of Self-Leveling Rubberised Concrete
Source: MDPI journal article supplement (doi:10.3390/ma15010249), 2021-12-29

*Supplementary materials*

**a)**

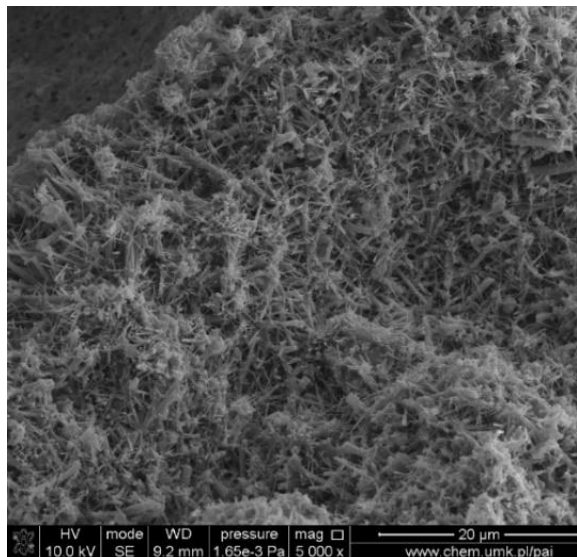

**b)**

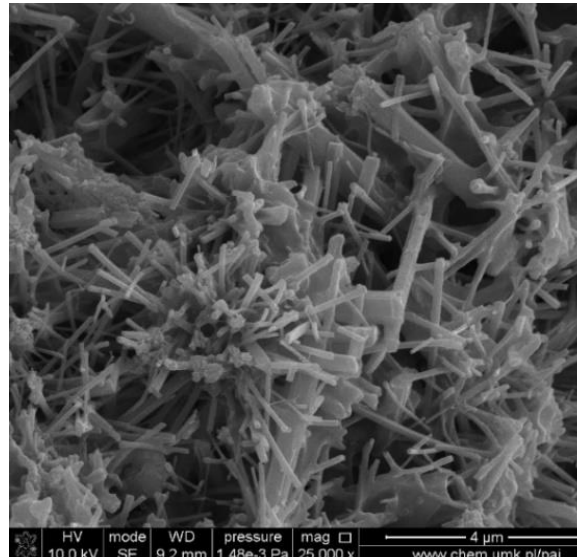

**Figure S1.** SEM images of 10% AS composite **a)** 5000x, **b)** 25000x.

Supplement: s1 [file s1]
